# Supplementary material for: Co-Formulation of Recombinant Porcine IL-18 Enhances the Onset of Immune Response in a New Lawsonia intracellularis Vaccine
Source: MDPI journal article supplement (doi:10.3390/vaccines11121788), 2023-11-30
Supplement: s1 [file s1]

**Supplementary Materials for**  
**Co-formulation of recombinant porcine IL-18 enhances the on-set of immune response in a new**  
*Lawsonia intracellularis* vaccine.

Angela Hidalgo-Gajardo <sup>1,2</sup>, Nicolás Gutiérrez <sup>1,2</sup>, Emilio Lamazares <sup>1</sup>, Felipe Espinoza <sup>1,2</sup>, Fernanda Escobar-Riquelme <sup>1</sup>, María José Leiva <sup>1</sup>, Carla Villavicencio <sup>1</sup>, Karel Mena-Ulecia <sup>3</sup>, Raquel Montesino <sup>1</sup>, Oliberto Sánchez <sup>1</sup>, Álvaro Ruiz <sup>4</sup>, Coralía Rivas <sup>5</sup>, Jorge R. Toledo <sup>1,\*</sup>.

<sup>1</sup> Laboratorio de Biotecnología y Biofármacos, Departamento de Fisiopatología, Facultad de Ciencias Biológicas, Universidad de Concepción, Chile.

<sup>2</sup> Centro de Desarrollo e Innovación Biovacuvel SpA, Concepción, Chile.

<sup>3</sup> Departamento de Ciencias Biológicas y Químicas, Facultad de Recursos Naturales, Universidad Católica de Temuco, Temuco, Chile.

<sup>4</sup> Departamento de Patología y Medicina Preventiva, Facultad de Ciencias Veterinarias, Universidad de Concepción, Chile.

<sup>5</sup> Laboratorio de Antioxidantes y Cáncer, Departamento de Fisiopatología, Facultad de Ciencias Biológicas, Universidad de Concepción, Chile.

\* Correspondence: jotoledo@udec.cl; Tel.: +56-41-2661118; Fax: +56-41-2203831.

**Table S1:** Results obtained from the search for the most suitable templates for constructing the models by homology for IL-18.

| Template | Seq Identity (%) | Found by | Method | Resolution (Å) | Seq Similarity | Coverage | Description              |
|----------|------------------|----------|--------|----------------|----------------|----------|--------------------------|
| 3wo2.3.A | 75.80            | HHblits  | X-ray  | 2.33           | 0.54           | 1.00     | Interleukin-18           |
| 4xfs.1.A | 74.52            | HHblits  | X-ray  | 1.91           | 0.53           | 1.00     | Interleukin-18           |
| 3wo2.4.A | 75.80            | HHblits  | X-ray  | 2.33           | 0.54           | 1.00     | Interleukin-18           |
| 3wo3.4.A | 75.80            | HHblits  | X-ray  | 3.10           | 0.54           | 1.00     | Interleukin-18           |
| 4xft.1.A | 75.16            | HHblits  | X-ray  | 2.00           | 0.53           | 1.00     | Interleukin-18           |
| 4ekx.1.C | 72.61            | HHblits  | X-ray  | 1.75           | 0.52           | 1.00     | Interleukin-18           |
| 4eee.1.B | 72.61            | HHblits  | X-ray  | 2.71           | 0.52           | 1.00     | Interleukin-18           |
| 4xfu.2.A | 74.52            | HHblits  | X-ray  | 2.85           | 0.53           | 1.00     | Interleukin-18           |
| 4xfu.1.A | 74.52            | HHblits  | X-ray  | 2.85           | 0.53           | 1.00     | Interleukin-18           |
| 4ekx.1.B | 72.61            | HHblits  | X-ray  | 1.75           | 0.52           | 1.00     | Interleukin-18           |
| 1j0s.1.A | 75.80            | HHblits  | NMR    | NA             | 0.54           | 1.00     | Interleukin-18           |
| 1iob.1.A | 17.39            | HHblits  | NMR    | 2.00           | 0.29           | 0.88     | Interleukin-1 BETA       |
| 9ilb.1.A | 17.39            | HHblits  | X-ray  | 2.28           | 0.29           | 0.88     | Human Interleukin-1 BETA |
| 6ilb.1.A | 17.39            | HHblits  | NMR    | NA             | 0.29           | 0.88     | Interleukin-1 BETA       |
| 1itb.1.A | 17.39            | HHblits  | X-ray  | 2.50           | 0.29           | 0.88     | Interleukin-1 BETA       |
| 7ilb.1.A | 17.39            | HHblits  | NMR    | NA             | 0.29           | 0.88     | Interleukin-1 BETA       |
| 2kh2.1.A | 17.39            | HHblits  | NMR    | NA             | 0.29           | 0.88     | Interleukin-1 beta       |
| 5mvz.1.C | 17.39            | HHblits  | X-ray  | 2.15           | 0.29           | 0.88     | Interleukin-1 beta       |
| 5mvz.2.C | 17.39            | HHblits  | X-ray  | 2.15           | 0.29           | 0.88     | Interleukin-1 beta       |

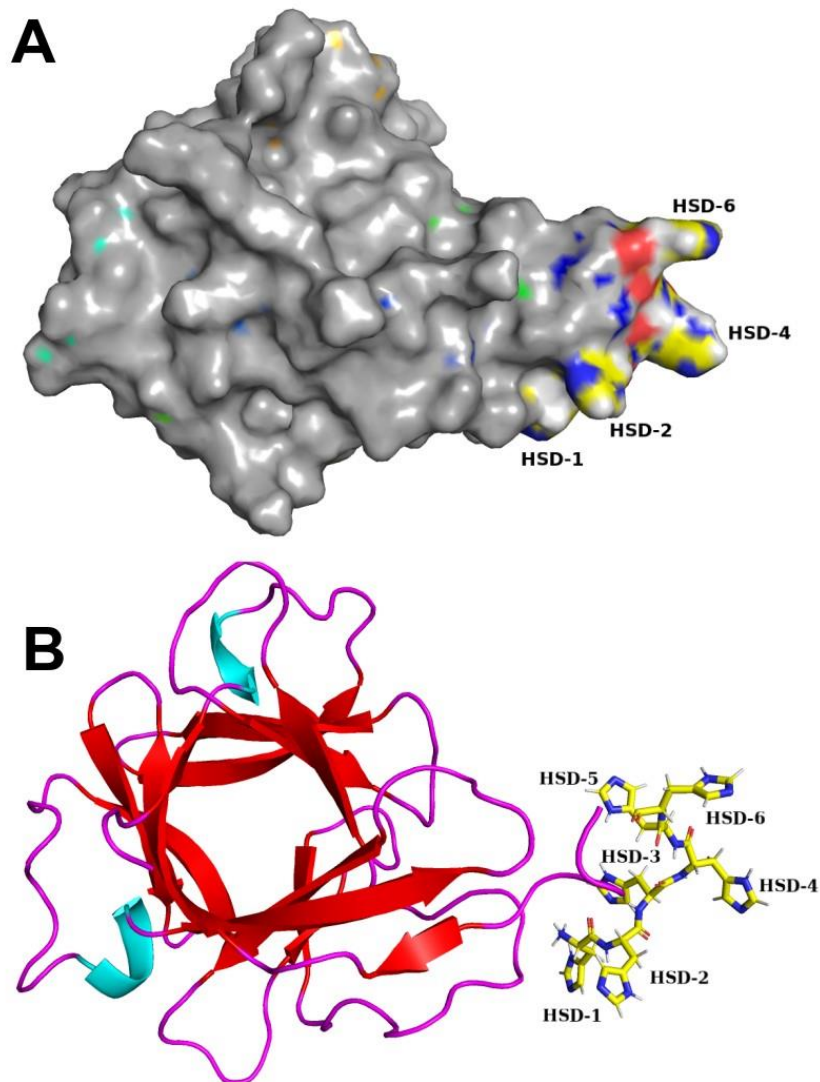

**Figure S1. Homology Modelling of the Histidine Tail of IL-18.** Modelling the IL-18 with the His-tag showed full exposure of only 3 histidine, the partial exposure of 1 histidine and the other 2 were hidden. (A) Surface model, (B) Cartoon model.
